# Supplementary material for: Efficient ORR electrocatalytic activity of peanut shell-based graphitic carbon microstructures
Source: Royal Society of Chemistry journal article supplement (doi:10.1039/c8ta02839g), 2018-01-01
Supplement: c8ta02839g1.pdf [file c8ta02839g1.pdf]

The electronic supplementary information for:

## Efficient ORR Electrocatalytic Activity of Peanut Shell-Based Graphitic Carbon Microstructures

Yanling Wu,<sup>a</sup> Yanli Chen,<sup>\*a</sup> Huiqiu Wang,<sup>a</sup> Chiming Wang,<sup>b</sup> Ansheng Wang,<sup>a</sup> Shuai Zhao,<sup>a</sup> Xiyu Li,<sup>a</sup> Daofeng Sun<sup>\*a</sup> and Jianzhuang Jiang<sup>\*a,b</sup>

---

<sup>a</sup> College of Science, China University of Petroleum (East China), Qingdao 266580, China. E-mail: yanlichen@upc.edu.cn

<sup>b</sup> Beijing Key Laboratory for Science and Application of Functional Molecular and Crystalline Materials, Department of Chemistry, University of Science and Technology Beijing, Beijing 100083, China. E-mail: jianzhuang@ustb.edu.cn

### Corresponding Author

\*E-mail: [yanlichen@upc.edu.cn](mailto:yanlichen@upc.edu.cn) (Y. Chen) and [jianzhuang@ustb.edu.cn](mailto:jianzhuang@ustb.edu.cn) (J. Jiang).

Fig. S1-S19, Table S1-S3

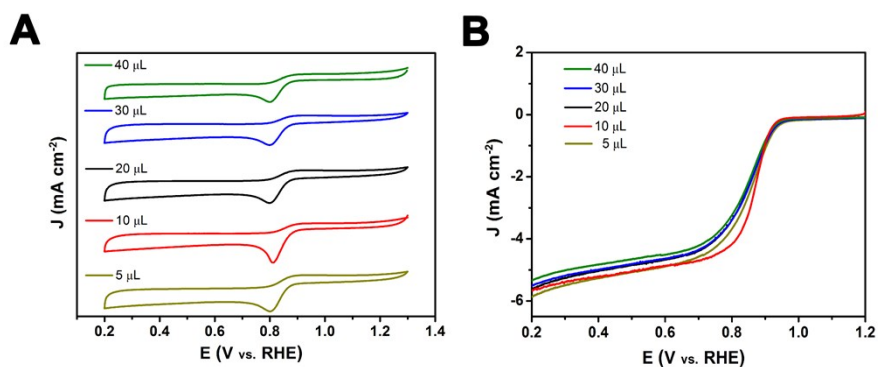

**Fig. S1** (A) CVs of the CoOP@bio-C catalyst under different quantities of Nafion in  $\text{O}_2$ -saturated 0.1 M KOH electrolyte; (B) LSV curves of CoOP@bio-C under different quantities of Nafion at  $10 \text{ mV s}^{-1}$  and a rotating speed of 1600 rpm, respectively.

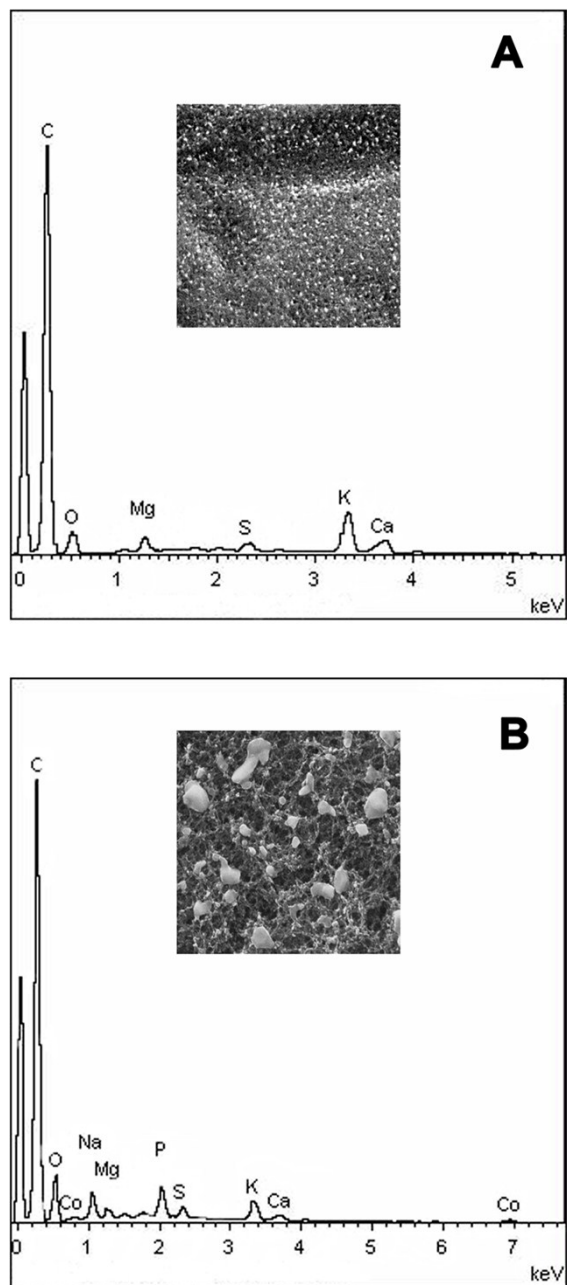

**Fig. S2** SEM and the corresponding EDS image of (A) bio-C-800 and (B) CoOP@bio-C, respectively.

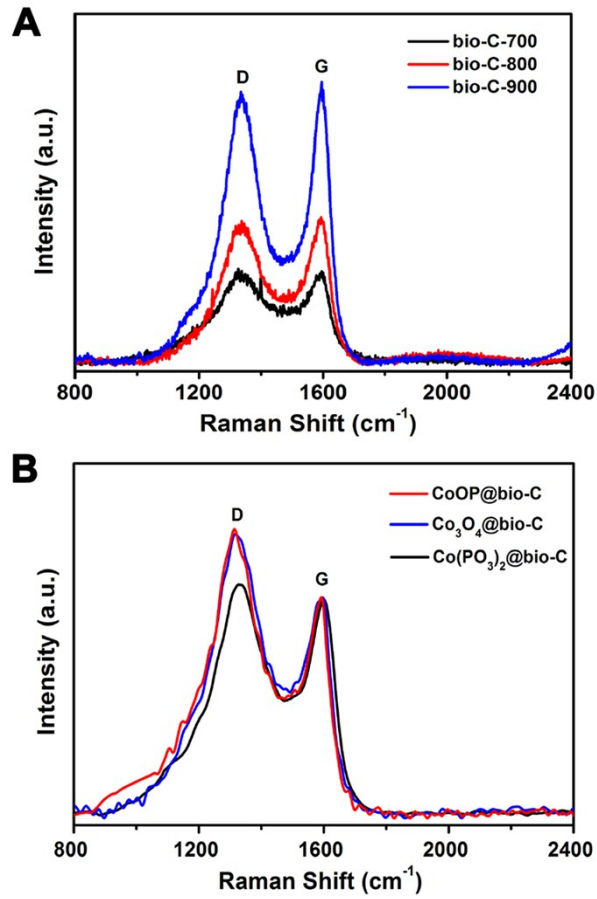

**Fig. S3** Raman spectra of (A) the bio-C-700, bio-C-800, bio-C-900 and (B) CoOP@bio-C, Co<sub>3</sub>O<sub>4</sub>@bio-C, Co(PO<sub>3</sub>)<sub>2</sub>@bio-C, respectively.

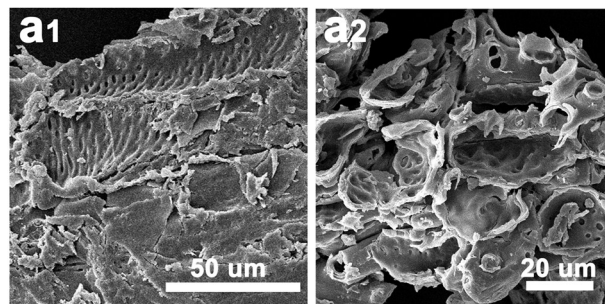

**Fig. S4** SEM image of the blank peanut shell power.

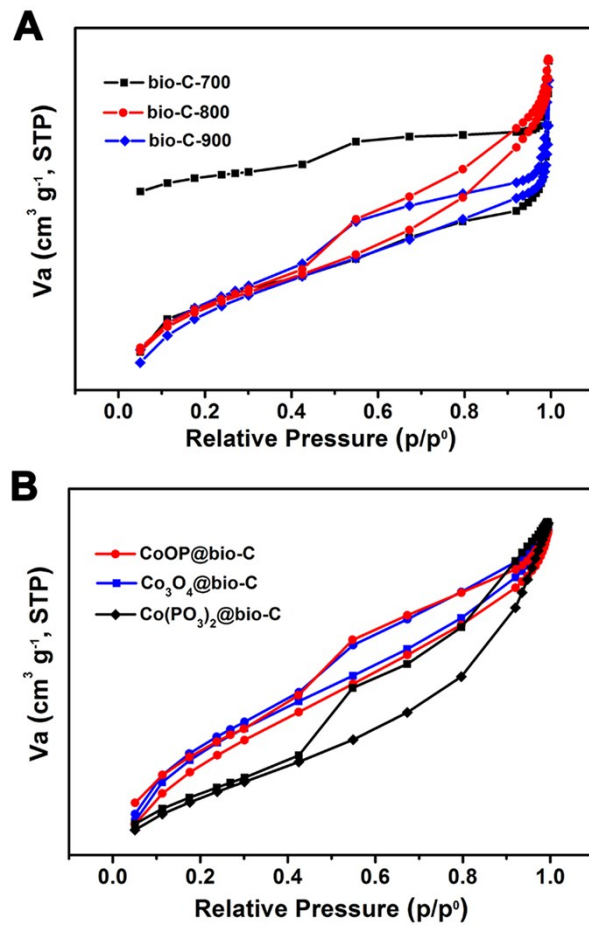

**Fig. S5**  $\text{N}_2$  adsorption/desorption isotherms of (A) the bio-C-700, bio-C-800, bio-C-900 and (B) the CoOP@bio-C,  $\text{Co}_3\text{O}_4$ @bio-C,  $\text{Co}(\text{PO}_3)_2$ @bio-C, respectively.

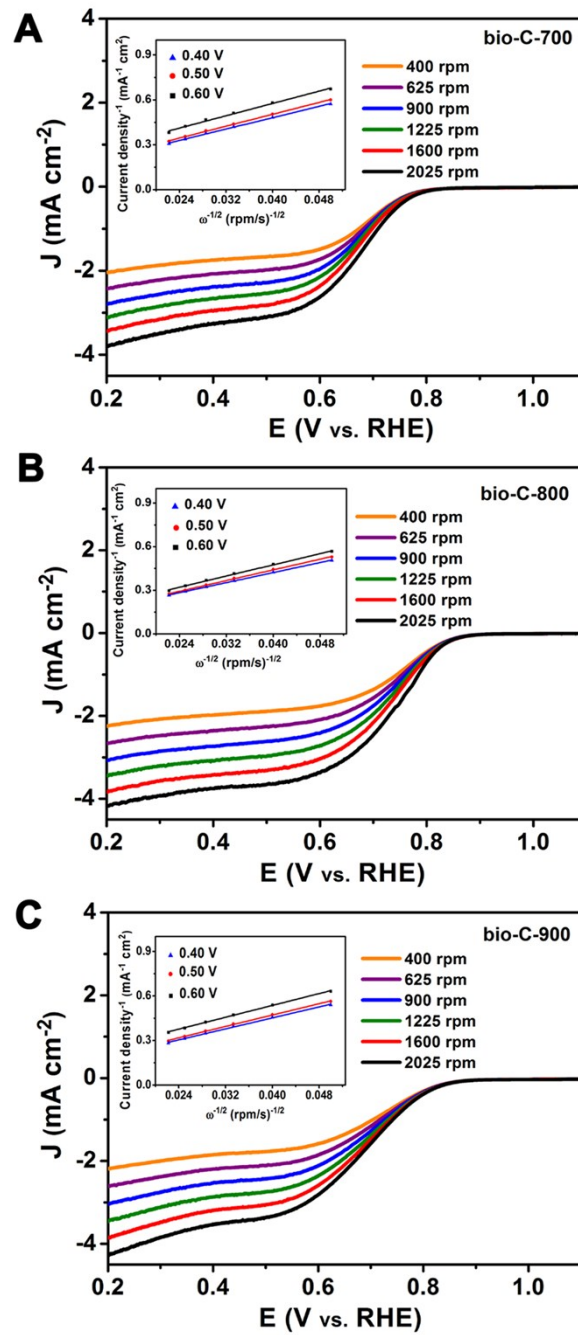

**Fig. S6** LSV curves at various rotating rates of the (A) bio-C-700, (B) bio-C-800 and (C) bio-C-900 in O<sub>2</sub>-saturated 0.1 M KOH electrolyte with a sweep rate of 10 mV s<sup>-1</sup>, respectively. (inset: corresponding K-L plots at various potentials)

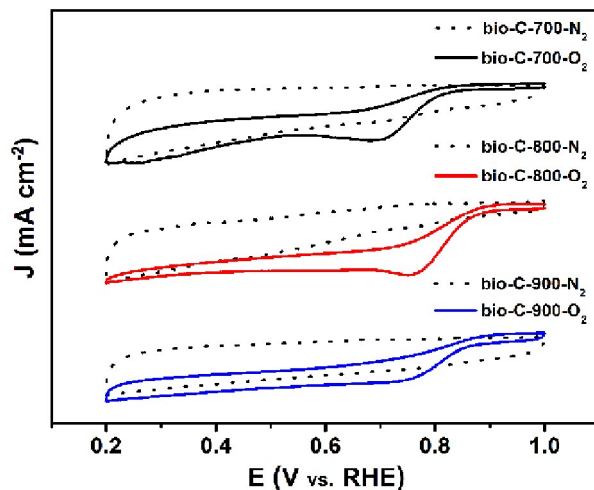

**Fig. S7** CVs of the bio-C-700, bio-C-800 and bio-C-900 catalysts in  $O_2$ -saturated (solid lines) and  $N_2$ -saturated (dot lines) 0.1 M KOH at  $10 \text{ mV s}^{-1}$ , respectively.

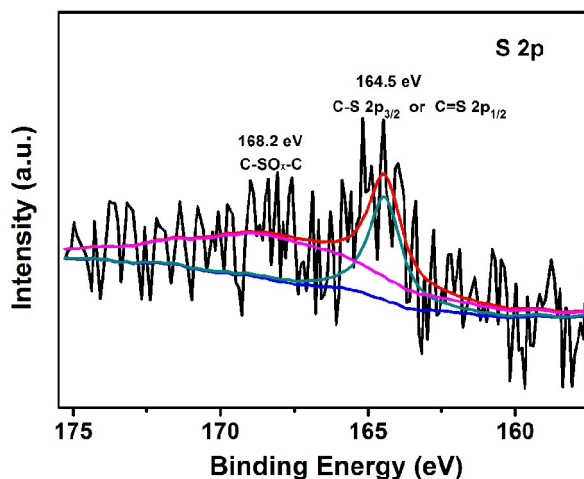

**Fig. S8** High-resolution XPS spectra of the S 2p core level for CoOP@bio-C.

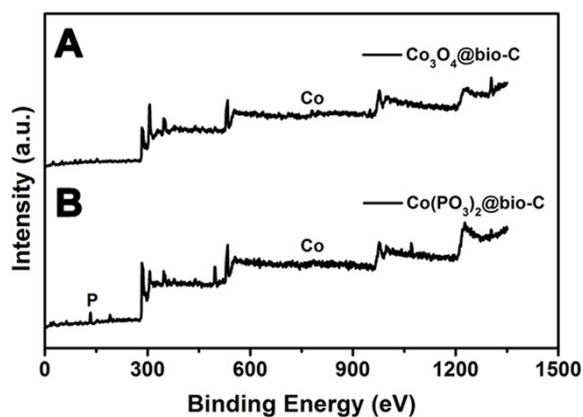

**Fig. S9** XPS survey spectra of the (A)  $Co_3O_4@bio-C$  and (B)  $Co(PO_3)_2@bio-C$  composites.

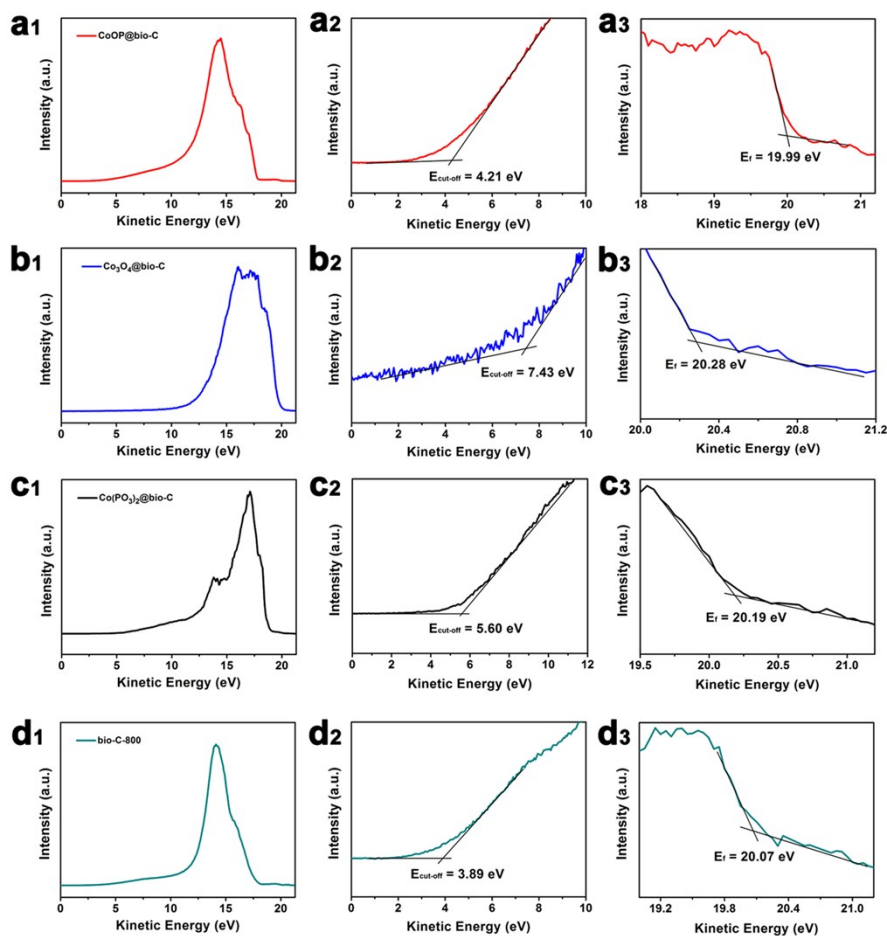

**Fig. S10** Ultraviolet photoelectron spectroscopy (UPS) measurements of CoOP@bio-C (a<sub>1</sub>, a<sub>2</sub> and a<sub>3</sub>), Co<sub>3</sub>O<sub>4</sub>@bio-C (b<sub>1</sub>, b<sub>2</sub> and b<sub>3</sub>), Co(PO<sub>3</sub>)<sub>2</sub>@bio-C (c<sub>1</sub>, c<sub>2</sub> and c<sub>3</sub>) and bio-C-800 (d<sub>1</sub>, d<sub>2</sub> and d<sub>3</sub>) (UV excitation by He I = 21.2 eV). The sample for UPS measurement was prepared by depositing a thin film (8 nm) on a small plate of SiO<sub>2</sub>/Si substance (size: 1.5 cm × 1.5 cm). The work function of samples can be calculated by using the following equation.

$$\Phi \text{ (work function)} = h\nu - |E_{\text{cut-off}} - E_f| \quad (3)$$

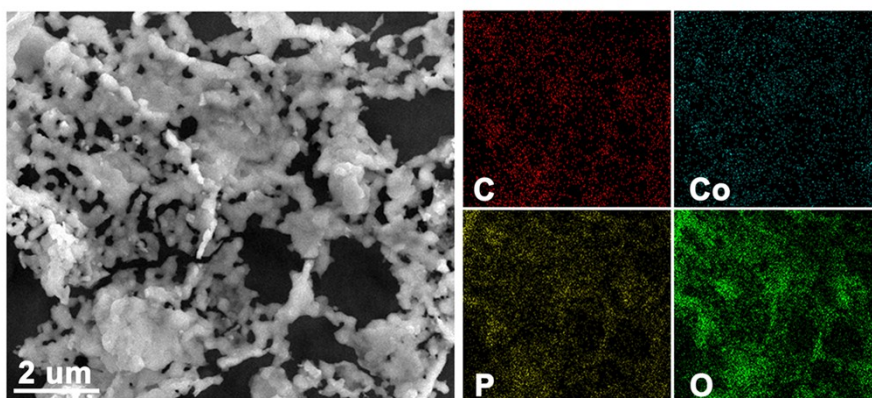

**Fig. S11** SEM image of CoOP@bio-C used in the EDS mapping revealing the elemental distribution of C, Co, P and O.



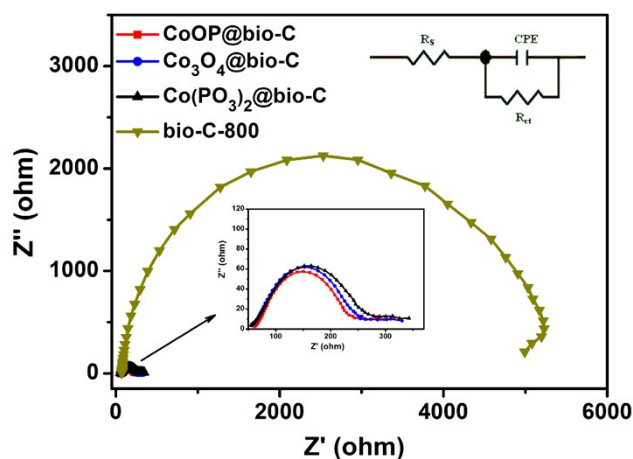

**Fig. S12** Nyquist plots of CoOP@bio-C, Co<sub>3</sub>O<sub>4</sub>@bio-C, Co(PO<sub>3</sub>)<sub>2</sub>@bio-C and bio-C-800 catalysts-modified electrodes in 0.1 M KOH solution in the frequency range of 0.1–10000 Hz, respectively. (inset: corresponding equivalent circuit)

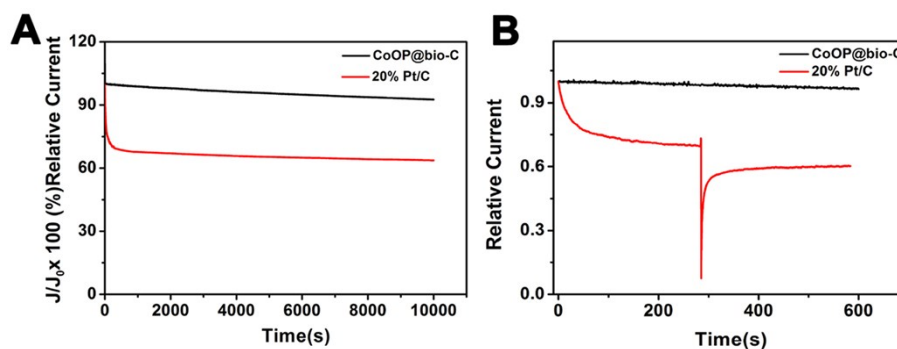

**Fig. S13** (A) Amperometric *i-t* curves of CoOP@bio-C and 20 wt% Pt/C and (B) upon the addition of 3 M methanol in O<sub>2</sub>-saturated 0.1 M KOH solution with the rotation speed of 1600 rpm.

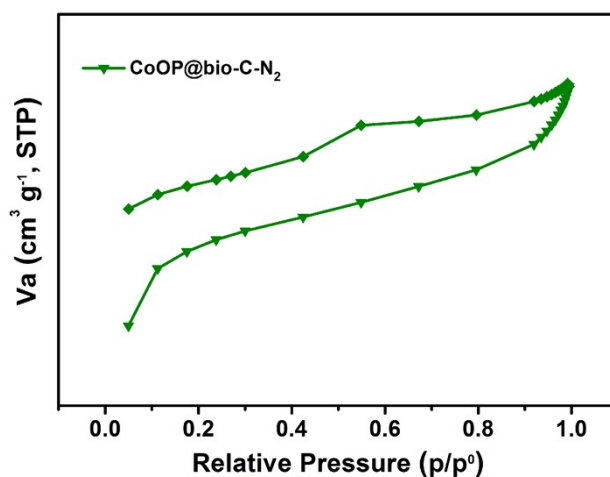

**Fig. S14** N<sub>2</sub> adsorption/desorption isotherms of the CoOP@bio-C-N<sub>2</sub>.

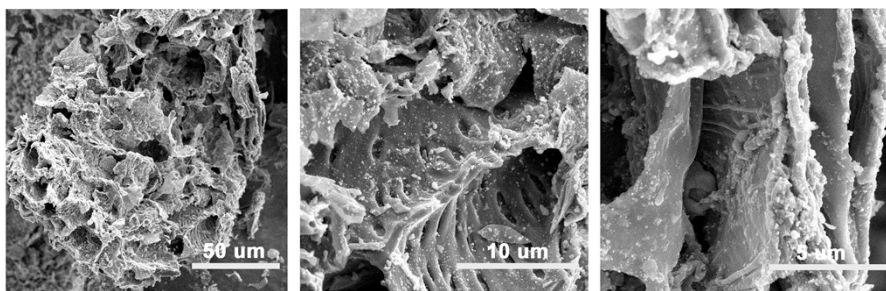

**Fig. S15** SEM images of the CoOP@bio-C-N<sub>2</sub> sample observed at the different amplification times.

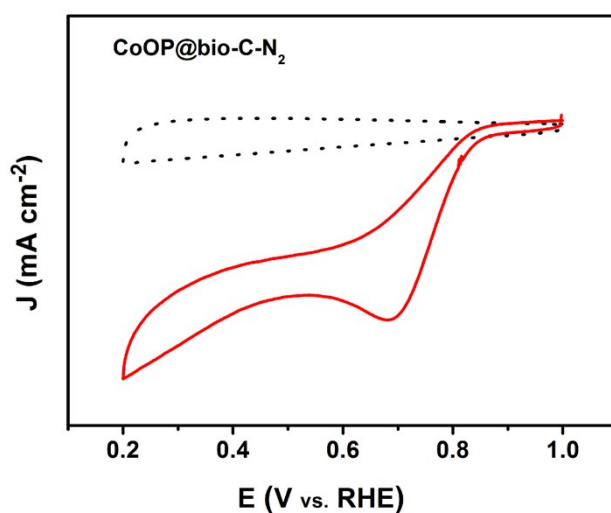

**Fig. S16** CV curve of the CoOP@bio-C-N<sub>2</sub> catalyst in O<sub>2</sub>-saturated (solid line) and N<sub>2</sub>-saturated (dot line) 0.1 M KOH electrolyte.

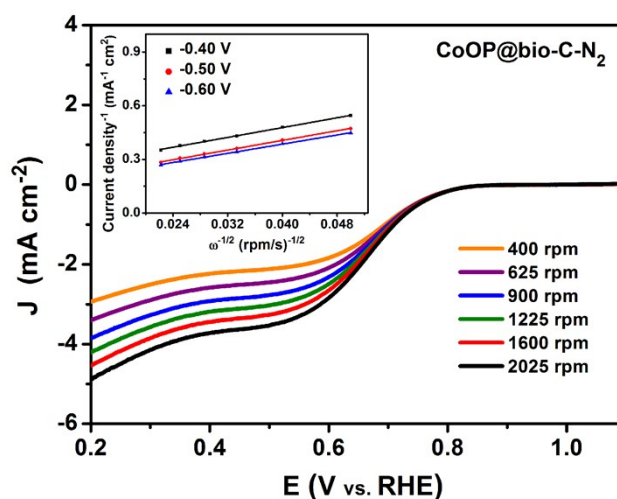

**Fig. S17** LSV curves at various rotating rates of the CoOP@bio-C-N<sub>2</sub> catalyst in O<sub>2</sub>-saturated 0.1 M KOH electrolyte. (inset: corresponding K–L plots at various potentials)

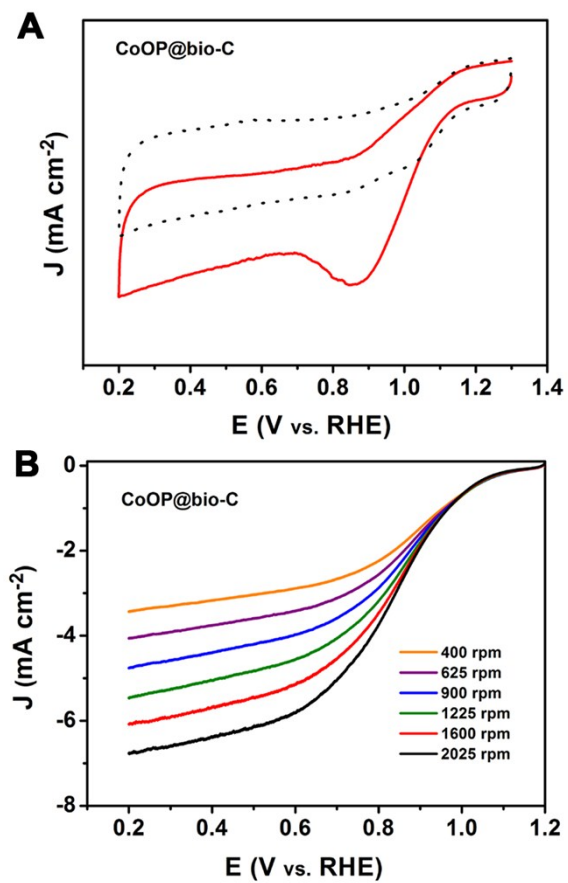

**Fig. S18** (A) CVs of CoOP@bio-C in O<sub>2</sub>-saturated (solid lines) and N<sub>2</sub>-saturated (dash lines) PBS solution at 10 mV s<sup>-1</sup>. (B) LSV curves of CoOP@bio-C at various rotating speeds.

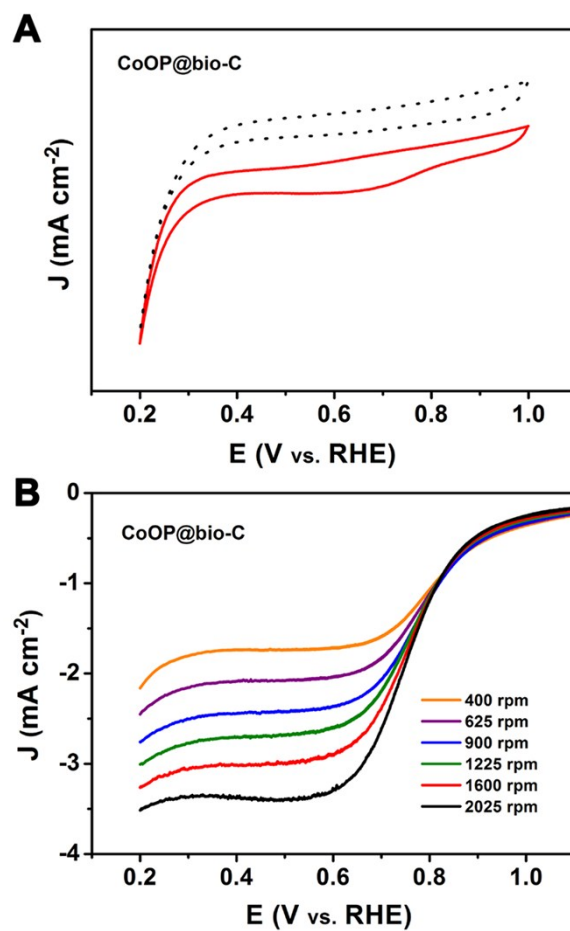

**Fig. S19** (A) CVs of CoOP@bio-C in O<sub>2</sub>-saturated (solid lines) and N<sub>2</sub>-saturated (dash lines) 0.5 M H<sub>2</sub>SO<sub>4</sub> media at 10 mV s<sup>-1</sup>. (B) LSV curves of CoOP@bio-C at various rotating speeds.

**Table S1** Comparison of the ORR performance for CoOP@bio-C catalysts at 1600 rpm in 0.1 M KOH.

| Catalysts                                           | Half-wave potential (V) | Current density J (mA cm <sup>-2</sup> ) | Onset potential (V) | Tafel slope (mV/dec <sup>-1</sup> ) | Electron transfer number | Reference                                  |
|-----------------------------------------------------|-------------------------|------------------------------------------|---------------------|-------------------------------------|--------------------------|--------------------------------------------|
| CoOP@bio-C                                          | 0.81                    | 5.67                                     | 0.91                | 57                                  | 3.93                     | This work                                  |
| urchin-like CoP NCs                                 | 0.70                    | 4.50                                     | 0.80                | --                                  | --                       | <i>Nano Lett.</i> , 2015 [1]               |
| Co-NC@CoP-NC                                        | 0.78                    | --                                       | 0.89                | --                                  | --                       | <i>J. Mater. Chem. A</i> , 2016 [2]        |
| NCS-800                                             | 0.75                    | 4.60                                     | 0.82                | --                                  | --                       | <i>Energy Environ. Sci.</i> , 2014 [3]     |
| N-CNAs                                              | 0.79                    | 4.35                                     | 0.92                | --                                  | --                       | <i>Small</i> , 2014 [4]                    |
| Co <sub>3</sub> (PO <sub>4</sub> ) <sub>2</sub> C-N | 0.84                    | 3.75                                     | 0.96                | --                                  | --                       | <i>Energy Environ. Sci.</i> , 2016 [5]     |
| Co@Co <sub>3</sub> O <sub>4</sub> @C                | 0.81                    | 4.65                                     | 0.93                | --                                  | --                       | <i>Energy Environ. Sci.</i> , 2015 [6]     |
| WHC-700                                             | 0.88                    | 4.40                                     | 0.98                | --                                  | --                       | <i>Nanoscale</i> , 2015 [7]                |
| NPC-800                                             | 0.76                    | 5.30                                     | 0.94                | --                                  | --                       | <i>Phys. Chem. Chem. Phys.</i> , 2016 [8]  |
| Co <sub>9</sub> S <sub>8</sub> @CNS900              | 0.83                    | 5.60                                     | 0.95                | --                                  | --                       | <i>Adv. Mater.</i> , 2016 [9]              |
| 3D-HPG                                              | 0.84                    | 5.50                                     | 0.93                | --                                  | --                       | <i>Nano Energy</i> , 2016 [10]             |
| CaI-CoZIF-VXC72                                     | -0.16                   | 5.92                                     | --                  | 35                                  | 4.0                      | <i>Adv. Mater.</i> , 2017 [12]             |
| AC-U-P                                              | -0.21                   | 5.40                                     | 0.98                | --                                  | 3.7                      | <i>Appl. Catal. B Environ.</i> , 2017 [13] |
| NC@CoPx/PyCNTs-900                                  | -0.20                   | 5.50                                     | 0.92                | 85                                  | 3.8                      | <i>Carbon</i> , 2018 [14]                  |

**Table S2** Surface areas of the bio-C-700, bio-C-800, bio-C-900, CoOP@bio-C, CoOP@bio-C-N<sub>2</sub>, Co<sub>3</sub>O<sub>4</sub>@bio-C and Co(PO<sub>3</sub>)<sub>2</sub>@bio-C, respectively.

| Sample                                   | BET surface area (m <sup>2</sup> g <sup>-1</sup> ) |
|------------------------------------------|----------------------------------------------------|
| bio-C-700                                | 95.6                                               |
| bio-C-800                                | 653.9                                              |
| bio-C-900                                | 461.7                                              |
| <b>CoOP@bio-C</b>                        | <b>671.4</b>                                       |
| CoOP@bio-C-N <sub>2</sub>                | 248.9                                              |
| Co <sub>3</sub> O <sub>4</sub> @bio-C    | 366.2                                              |
| Co(PO <sub>3</sub> ) <sub>2</sub> @bio-C | 324.4                                              |

**Table S3** The ORR performance of the bio-C-700, bio-C-800, bio-C-900, CoOP@bio-C, CoOP@bio-C-N<sub>2</sub>, Co<sub>3</sub>O<sub>4</sub>@bio-C and Co(PO<sub>3</sub>)<sub>2</sub>@bio-C in alkaline media at 1600 rpm, respectively.

| Sample                                   | Onset potential (V) | Half wave potential (V) | Current density J (mA cm <sup>-2</sup> ) | Tafel slope (mV dec <sup>-1</sup> ) | Electron transfer number |
|------------------------------------------|---------------------|-------------------------|------------------------------------------|-------------------------------------|--------------------------|
| bio-C-700                                | 0.73                | 0.71                    | 3.43                                     |                                     | 2.95                     |
| bio-C-800                                | 0.83                | 0.75                    | 3.84                                     |                                     | 3.23                     |
| bio-C-900                                | 0.81                | 0.69                    | 3.86                                     |                                     | 3.02                     |
| <b>CoOP@bio-C</b>                        | <b>0.91</b>         | <b>0.81</b>             | <b>5.70</b>                              |                                     | <b>3.93</b>              |
| CoOP@bio-C-N <sub>2</sub>                | 0.79                | 0.68                    | 4.49                                     |                                     | 3.19                     |
| Co <sub>3</sub> O <sub>4</sub> @bio-C    | 0.86                | 0.78                    | 5.20                                     |                                     | 3.86                     |
| Co(PO <sub>3</sub> ) <sub>2</sub> @bio-C | 0.85                | 0.77                    | 4.14                                     |                                     | 3.47                     |
| Pt/C                                     | 0.97                | 0.83                    | 4.28                                     |                                     | 3.94 [15]                |

## Notes and references

- 1 H. C. Yang, Y. J. Zhang, F. Hu and Q. B. Wang, *Nano Lett.*, 2015, **15**, 7616–7620.
- 2 X. Y. Li, Q. Q. Jiang, S. Dou, L. B. Deng, J. Huo and S. Y. Wang, *J. Mater. Chem. A*, 2016, **4**, 15836–15840.
- 3 P. Chen, L. K. Wang, G. Wang, M. R. Gao, J. Ge, W. J. Yuan, Y. H. Shen, A. J. Xie and S. H. Yu, *Energy Environ. Sci.*, 2014, **7**, 4095–4103.
- 4 H. M. Zhang, Y. Wang, D. Wang, Y. B. Li, X. L. Liu, P. R. Liu, H. G. Yang, T. C. An, Z. Y. Tang and H. J. Zhao, *Small*, 2014, **10**, 3371–3378.
- 5 T. H. Zhou, Y. H. Du, S. M. Yin, X. Z. Tian, H. B. Yang, X. Wang, B. Liu, H. M. Zheng, S. Z. Qiao and R. Xu, *Energy Environ. Sci.*, 2016, **9**, 2563–2570.
- 6 W. Xia, R. Q. Zou, L. An, D. G. Xia and S. J. Guo, *Energy Environ. Sci.*, 2015, **8**, 568–576.
- 7 X. J. Liu, Y. C. Zhou, W. J. Zhou, L. G. Li, S. B. Huang and S. W. Chen, *Nanoscale*, 2015, **7**, 6136–6142.
- 8 R. R. Liu, H. M. Zhang, S. W. Liu, X. Zhang, T. X. Wu, X. Ge, Y. P. Zang, H. J. Zhao and G. Z. Wang, *Phys. Chem. Chem. Phys.*, 2016, **18**, 4095–4101.
- 9 Q. L. Zhu, W. Xia, T. Akita, R. Q. Zou and Q. Xu, *Adv. Mater.*, 2016, **28**, 6391–6398.
- 10 Y. F. Zhao, S. F. Huang, M. R. Xia, S. Rehman, S. C. Mu, Z. K. Kou, Z. Zhang, Z. Y. Chen, F. M. Gao and Y. L. Hou, *Nano Energy*, 2016, **28**, 346–355.
- 11 T. H. Zhou, Y. H. Du, S. M. Yin, X. Z. Tian, H. B. Yang, X. Wang, B. Liu, H. M. Zheng, S. Z. Qiao and R. Xu, *Energy Environ. Sci.*, 2016, **9**, 2563–2570.
- 12 B. Ni, C. Ouyang, X. B. Xu, J. Zhuang and X. Wang, *Adv. Mater.*, 2017, **29**, 1701354.
- 13 M. Borghei, N. Laocharoen, E. Kibena-Pöldsepp, L. S. Johansson, J. Campbell, E. Kauppinen, K. Tammeveski and O. J. Rojas, *Appl. Catal. B Environ.*, 2017, **204**, 394–402.
- 14 Q. Wang, Y. Fan, K. K. Wang, H. M. Shen, G. J. Li, H. Y. Fu and Y. B. She, *Carbon*, 2018, **130**, 241–249.
- 15 Z. S. Wu, Long. Chen, J. Z. Liu, K. Parvez, H. W. Liang, J. Shu, H. Sachdev, R. Graf, X. L. Feng and K. Müllen, *Adv. Mater.*, 2014, **26**, 1450–1455.
